# Supplementary material for: Garcinol Attenuates Lipoprotein(a)-Induced Oxidative Stress and Inflammatory Cytokine Production in Ventricular Cardiomyocyte through α7-Nicotinic Acetylcholine Receptor-Mediated Inhibition of the p38 MAPK and NF-κB Signaling Pathways
Source: PubMed Central journal article supplement (PMC8000018; doi:10.3390/antiox10030461), 2021-03-16
Supplement: antioxidants-10-00461-s001.pdf [file antioxidants-10-00461-s001.pdf]

## Supplementary Information

### **Garcinol attenuates lipoprotein(a)-induced oxidative stress and inflammatory cytokine production in ventricular cardiomyocyte through $\alpha 7$ -nicotinic acetylcholine receptor-mediated inhibition of the p38 MAPK and NF- $\kappa$ B signaling pathways**

Disclosed by Nen-Chung Chang<sup>1,2,3,‡</sup>, Chi-Tai Yeh<sup>4,5,‡</sup>, Yen-Kuang Lin<sup>6,7,8</sup>, Kuang-Tai Kuo<sup>9,10</sup>, Iat-Hang Fong<sup>4,5</sup>, Nicholas G. Kounis<sup>11</sup>, Patrick Hu<sup>12,13</sup> and Ming-Yow Hung<sup>2,3,14,\*</sup>

<sup>1</sup> Division of Cardiology, Department of Internal Medicine, Taipei Medical University Hospital, Taipei 110, Taiwan

<sup>2</sup> Division of Cardiology, Department of Internal Medicine, School of Medicine, College of Medicine,

Taipei Medical University, Taipei 110, Taiwan; [ncchang@tmu.edu.tw](mailto:ncchang@tmu.edu.tw)

<sup>3</sup> Taipei Heart Institute, Taipei Medical University, Taipei 110, Taiwan

<sup>4</sup> Department of Medical Research and Education, Taipei Medical University—Shuang Ho Hospital, New Taipei City **23561**, Taiwan; [ctyeh@s.tmu.edu.tw](mailto:ctyeh@s.tmu.edu.tw) (C.-T.Y.); [impossiblewasnothing@hotmail.com](mailto:impossiblewasnothing@hotmail.com) (I.-H.F.)

<sup>5</sup> Department of Medical Laboratory Science and Biotechnology, Yuanpei University of Medical Technology, Hsinchu City 30015, Taiwan.

<sup>6</sup> Biostatistics Center, Office of Data Science, Taipei Medical University, Taipei **110**, Taiwan.

<sup>7</sup> Graduate Institute of Data Science, Taipei Medical University, Taipei **110**, Taiwan.

<sup>8</sup> Research Center of Big Data, College of Management, Taipei Medical University, Taipei **110**, Taiwan; [robbinlin@tmu.edu.tw](mailto:robbinlin@tmu.edu.tw)

<sup>9</sup> Division of Thoracic Surgery, Department of Surgery, Shuang Ho Hospital, Taipei Medical University, New Taipei City **23561**, Taiwan; [doc2738h@gmail.com](mailto:doc2738h@gmail.com)

<sup>10</sup> Division of Thoracic Surgery, Department of Surgery, School of Medicine, College of Medicine, Taipei Medical University, Taipei **110**, Taiwan

<sup>11</sup> Department of Internal Medicine, Division of Cardiology, University of Patras Medical School, Patras **26221**, Greece; [ngkounis@otenet.gr](mailto:ngkounis@otenet.gr)

<sup>12</sup> University of California, Riverside, Riverside, CA **92521**, USA;  
[patrick.p.hu@gmail.com](mailto:patrick.p.hu@gmail.com)

<sup>13</sup> Department of Cardiology, Riverside Medical Clinic, Riverside, CA **92506**, USA

<sup>14</sup> Division of Cardiology, Department of Internal Medicine, Shuang Ho Hospital,  
Taipei Medical University, New Taipei City **23561**, Taiwan

\* Correspondence: [myhung6@ms77.hinet.net](mailto:myhung6@ms77.hinet.net) ; Tel.: +886 2 22490088

‡ They contributed equally to this work.

# Drs Chi-Tai Yeh, and Nen-Chung Chang contributed equally.

**\*Corresponding authors:** Ming-Yow Hung, MD, PhD, FAHA. Division of Cardiology, Department of Internal Medicine, Shuang Ho Hospital, Taipei Medical University, No.291, Zhongzheng Rd., Zhonghe District, New Taipei City, 23561, Taiwan. Tel.: +886 2 22490088; Fax: +886 2 82622010; E-mail: [myhung6@ms77.hinet.net](mailto:myhung6@ms77.hinet.net)

**Running Title:** Lipoprotein(a) medicates CAS through  $\alpha 7$ -nAChR/p38MAPK signaling.

**Supplementary Table S1.** Primer sequence in this study

| Gene              |         | sequence               |
|-------------------|---------|------------------------|
| $\alpha 7$ -nAChR | forward | GCCAATGACTCGCAACCACTC  |
|                   | reverse | CCAGCGTACATCGATGTAGCA  |
| IL-6              | forward | AGACAGCCACTCACCTCTTCAG |
|                   | reverse | TTCTGCCAGTGCCTCTTTGCTG |
| TNF- $\alpha$     | forward | CTCTTCTGCCTGCTGCACTTTG |
|                   | reverse | ATGGGCTACAGGCTTGTCCTC  |
| CRP               | forward | TCGACGCGTGGAAAGAG      |
|                   | reverse | TAGAATCAGATTATCCTGAC   |
| NF $\kappa$ B     | forward | GCAGCACTACTTCTTGACCACC |
|                   | reverse | TCTGCTCCTGAGCATTGACGTC |

**Supplementary Table S2.** Western blot antibodies sheet.

| No. | Target           | Dilution |           | Source         |
|-----|------------------|----------|-----------|----------------|
| 1   | $\alpha$ 7-nAChR | 1:500    | ab216485  | abcam          |
| 2   | CaMKII           | 1:1000   | #50049    | Cell signaling |
| 3   | p-CaMKII         | 1:1000   | #12716    | Cell signaling |
| 4   | Erk1/2           | 1:5000   | #4695     | Cell signaling |
| 5   | p-Erk1/2         | 1:5000   | #4370     | Cell signaling |
| 6   | p38 MAPK         | 1:1000   | #8690     | Cell signaling |
| 7   | p-p38 MAPK       | 1:1000   | #4511     | Cell signaling |
| 8   | GSK-3 $\beta$    | 1:2000   | #12456    | Cell signaling |
| 9   | p-GSK-3 $\beta$  | 1:2000   | #5558     | Cell signaling |
| 10  | IL-6             | 1:2000   | ab6672    | abcam          |
| 11  | TNFA             | 1:5000   | ab92324   | abcam          |
| 12  | CRP              | 1:5000   | ab185558  | abcam          |
| 13  | NF-kB            | 1:1000   | ab16502   | abcam          |
| 14  | IGF-IIR          | 1:1000   | sc-136321 | Santa Cruz     |
| 15  | HSF1             | 1:1000   | sc-17757  | Santa Cruz     |
| 16  | caspase-3        | 1:1000   | sc-7272   | Santa Cruz     |
| 17  | VCAM-1           | 1:1000   | #39036    | Cell signaling |
| 18  | ICAM-1           | 1:1000   | #4915     | Cell signaling |
| 19  | E-Selectin       | 1:1000   | sc-137054 | Santa Cruz     |
| 20  | p-MBS            | 1:1000   | #3040     | Cell signaling |
| 21  | t-MBS            | 1:1000   | #2634     | Cell signaling |

|    |                |         |            |                |
|----|----------------|---------|------------|----------------|
| 22 | RhoA           | 1:1000  | #2117      | Cell signaling |
| 23 | RhoA-GTP       | 1:1000  | #8820      | Cell signaling |
| 24 | ROCK1          | 1:1000  | #4035      | Cell signaling |
| 25 | ROCK2          | 1:1000  | #9029      | Cell signaling |
| 26 | $\beta$ -actin | 1:10000 | 66009-1-Ig | PROTEINTECH    |

---

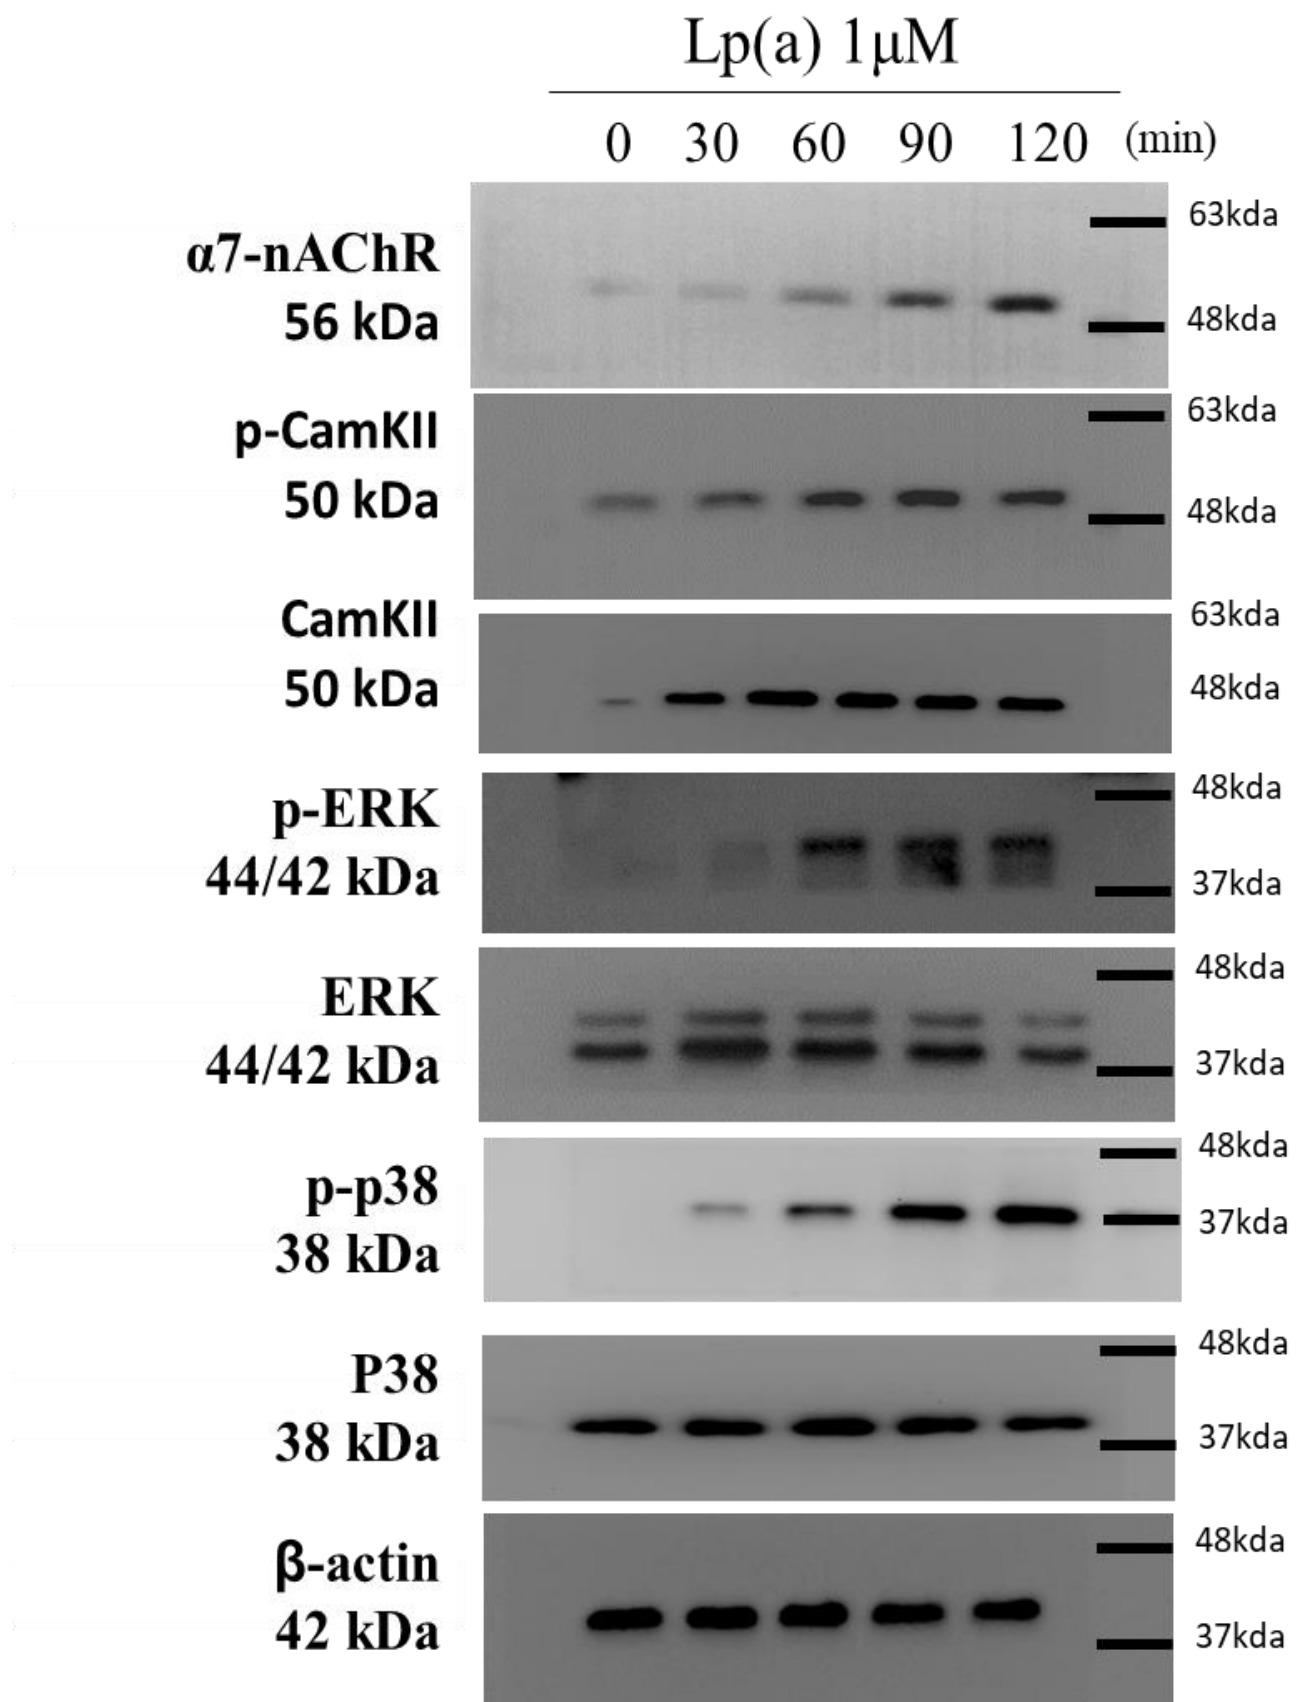

Supplementary Figure S1. Full-size blots of Figure 1F

|          |   |   |     |   |     |
|----------|---|---|-----|---|-----|
| Lp (a)   | - | + | +   | + | +   |
| Garcinol | - | - | 0.5 | 1 | 2.5 |

**$\alpha$ 7-nAChR**  
56 kDa

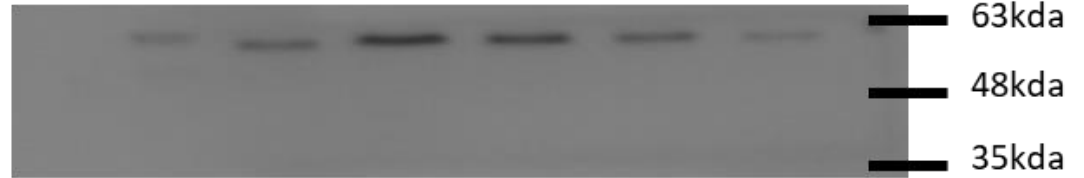

**$\beta$ -actin**  
42 kDa

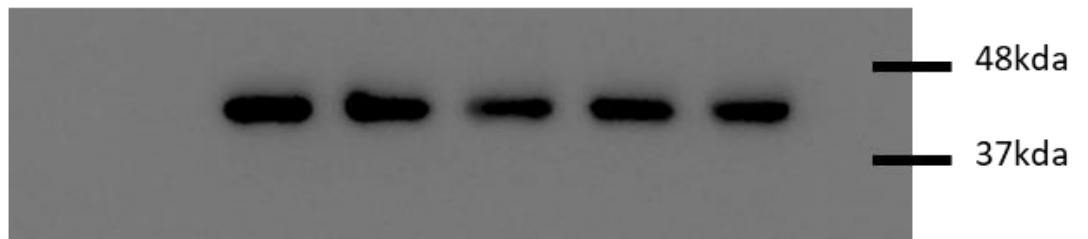

Supplementary Figure S2. Full-size blots of Figure 2F

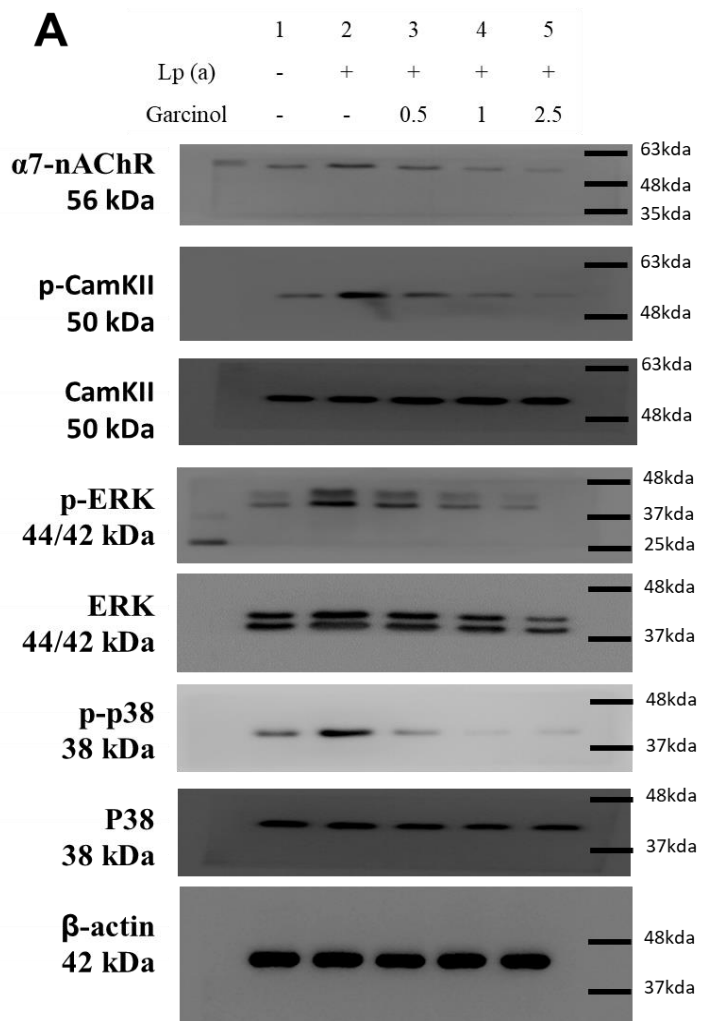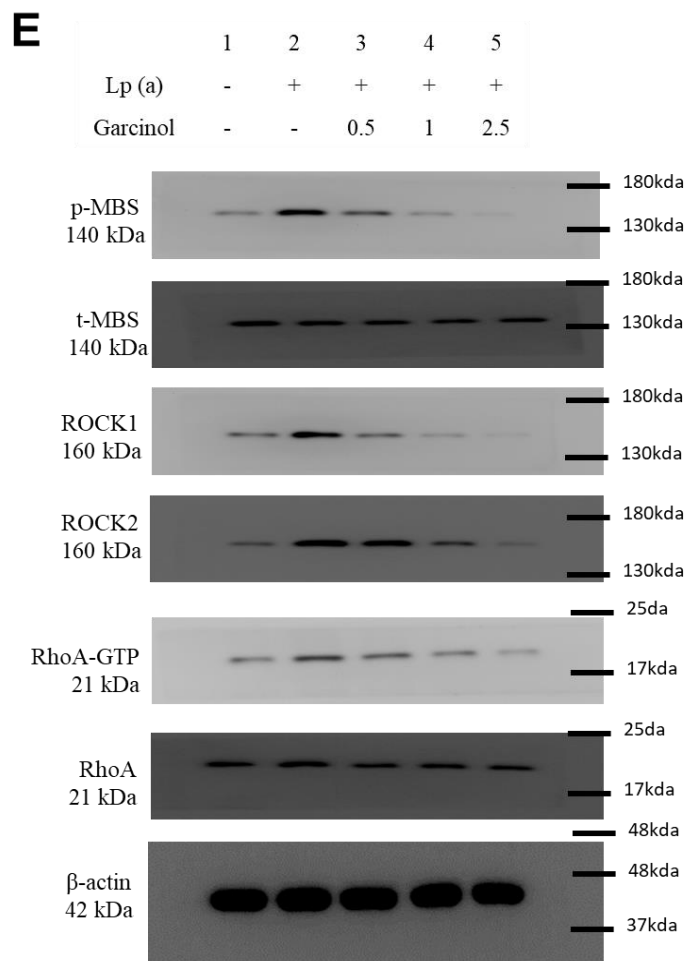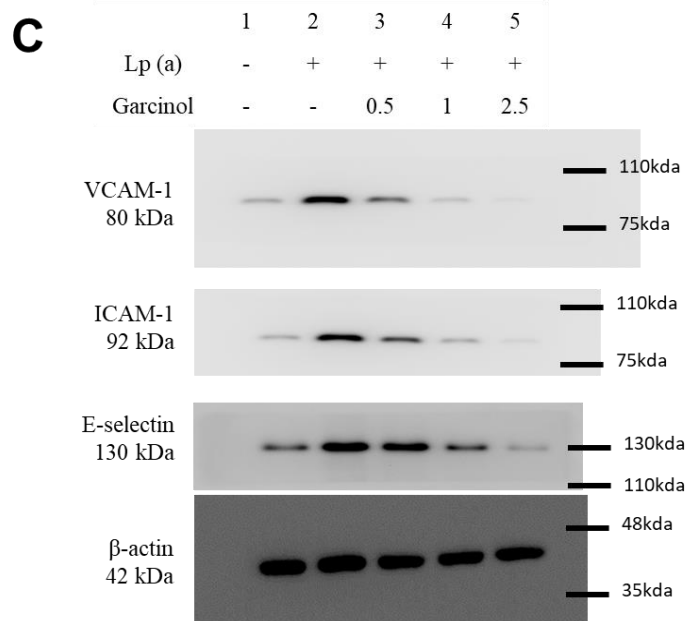

**Supplementary Figure S3.** Full-size blots of Figure 2A, 3C and 3E



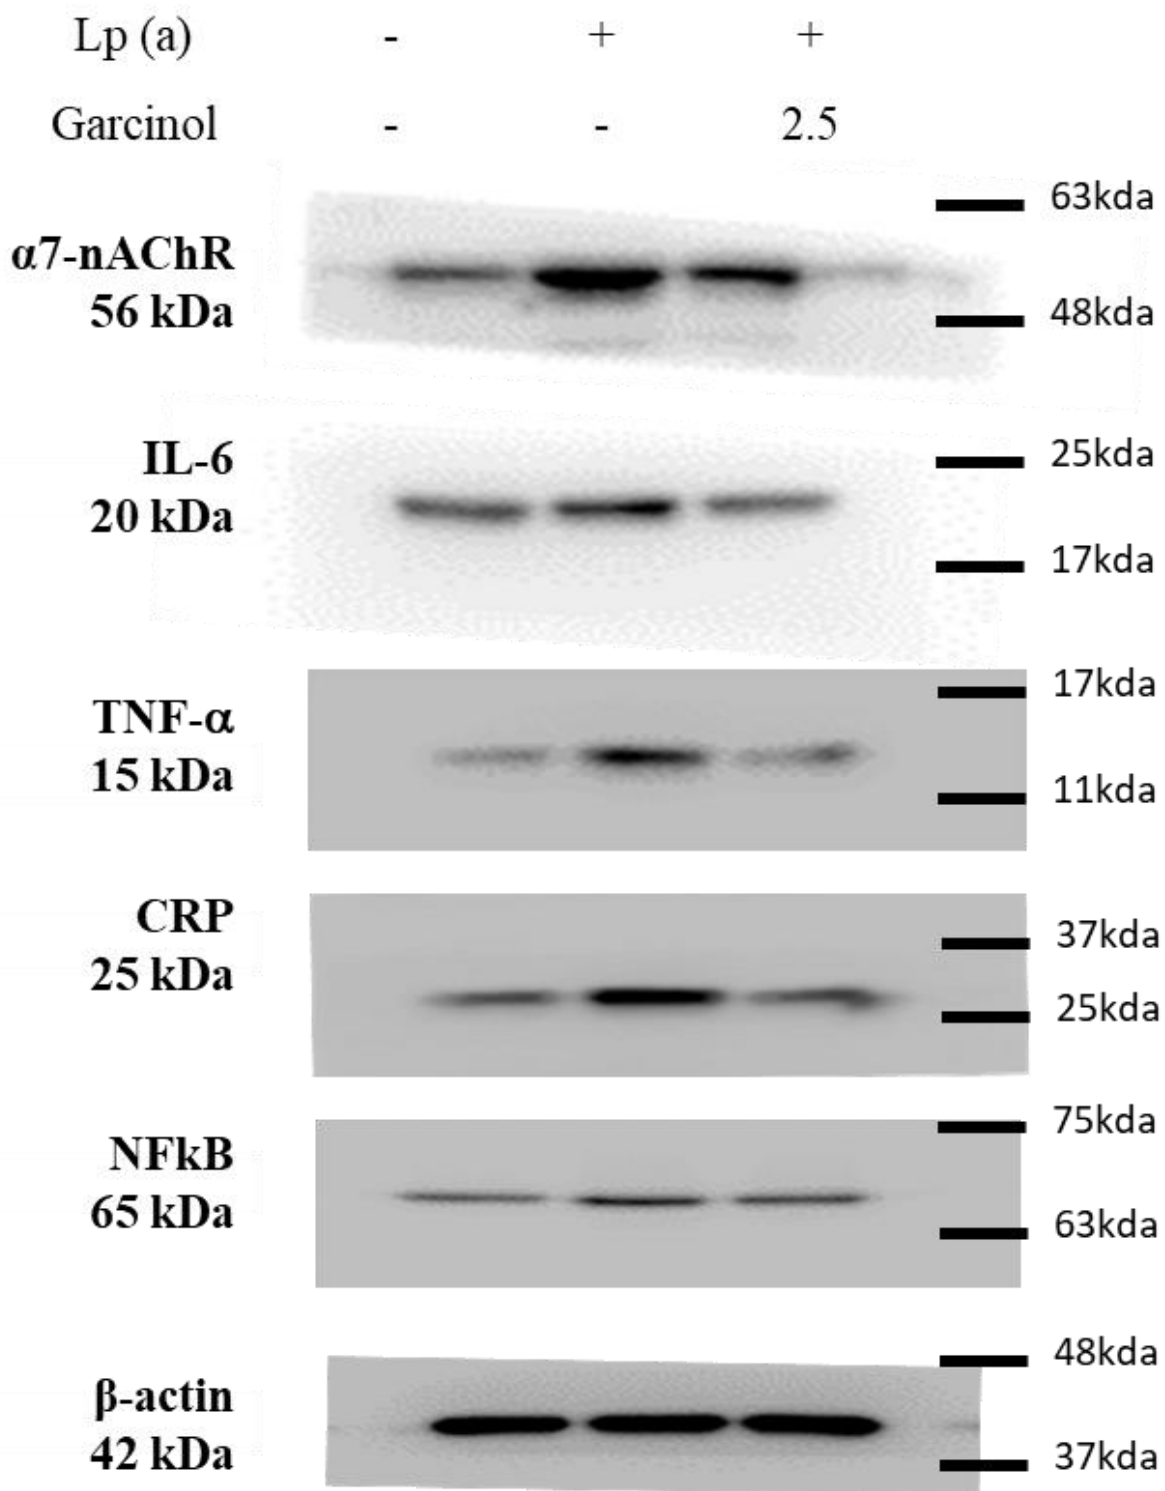

Supplementary Figure S4. Full-size blots of Figure 4B

|                        |   |   |   |   |   |
|------------------------|---|---|---|---|---|
| Garcinol (2.5 $\mu$ M) | - | + | - | + | - |
| Lp (a)                 | - | - | + | + | + |
| SB203580               | - | - | - | - | + |

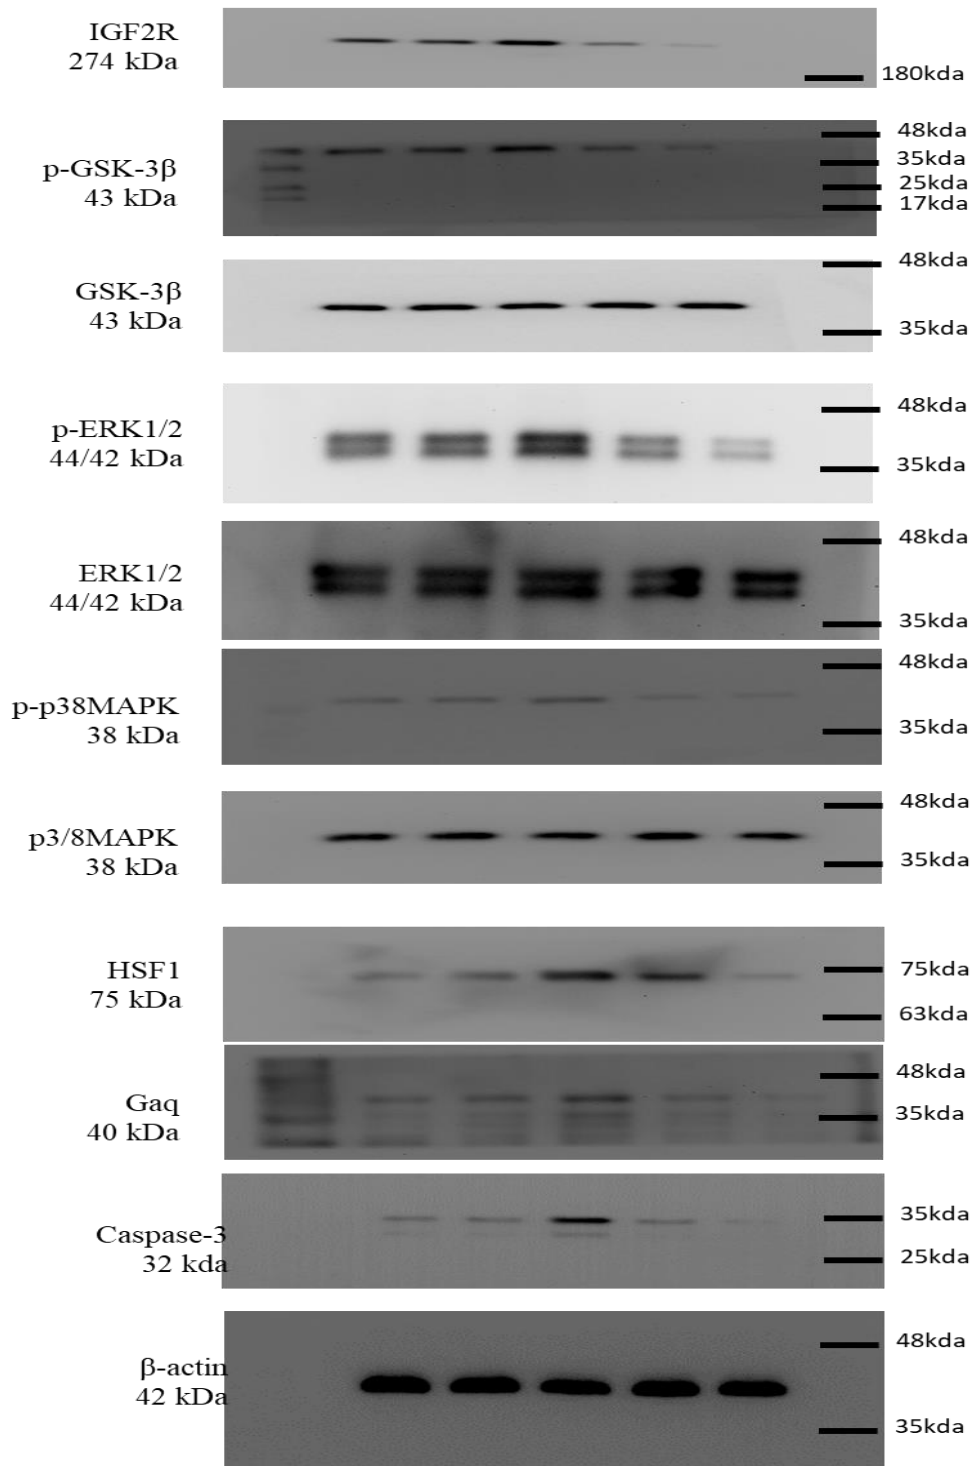

**Supplementary Figure S5.** Full-size blots of Figure 5A

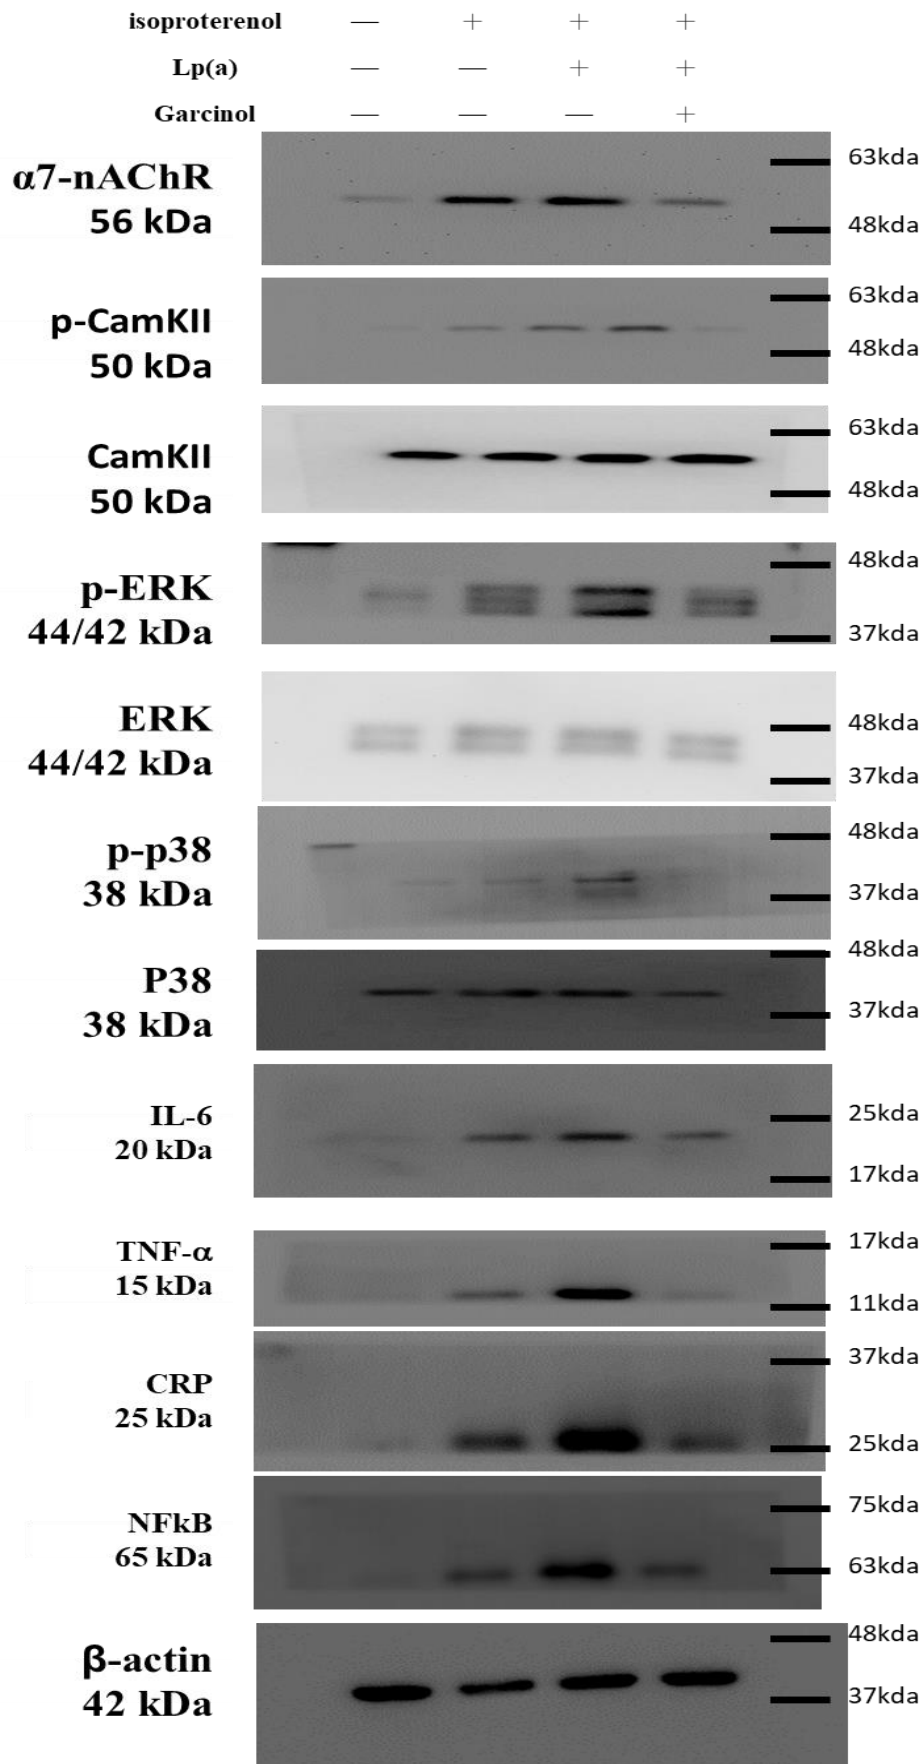

Supplementary Figure S6. Full-size blots of Figure 6D
